# Supplementary material
Source: publisher figshare collection journal article supplement (https://frontiersin.figshare.com/ndownloader/files/22043373)
Supplement: Supplementary file 1 [file 22043373]

BdorOBP1 left 5'-TTGATTATCCGGACGAGGAG-3'  
BdorOBP1 right 5'-AGGCCCTGTAACACCACTTG-3'  
BdorOBP2 left 5'-GACGGGAGTGACAGAAGAGG-3'  
BdorOBP2 right 5'-GCATGGATTCCGGTAATTTG-3'  
BdorOBP7 left 5'-CAGGCAAATTCCAGATTCGT-3'  
BdorOBP7 right 5'-CGCAGTGAATTGCGCTATAA-3'  
BdorOBP10 left 5'-CGTACGGAAATATGCGCTTT-3'  
BdorOBP10 right 5'-TCATCGGTCTCCTCTTTGGT-3'  
BdorOBP11 left 5'-GCGAGATGTGTGCTTACCAA-3'  
BdorOBP11 right 5'-TGCGTCCTTGCATTTTCAGTA-3'  
BdorPBPRP left 5'-TTCTATTCGCCGCCTTATGT-3'  
BdorPBPRP right 5'-ACGCTGGTACTTTTTCGACT-3'  
BdorOBP12 left 5'-GTCCTTGCAACCGTATTCGT-3'  
BdorOBP12 right 5'-ACGTCCTTCGTGTCTGGAAC-3'  
BdorOBP13 left 5'-GGGCACATCCTGAAACAGAT-3'  
BdorOBP13 right 5'-CCGTTATGTTTCGGCAATTCT-3'  
BdorOBP14 left 5'-TTGGTGCAAGTGATGACGAT-3'  
BdorOBP14 right 5'-TTGCTACTTTCCGGAGTGCT-3'  
BdorOBP17 left 5'-CGTGGAGCTTTCCAGATGAT-3'  
BdorOBP17 right 5'-TCTCAATAGCTCCGTGCGTA-3'  
BdorOBP18 left 5'-CTAAATGGCATGGGCTTCAT-3'  
BdorOBP18 right 5'-GCATACGCGCACATAACATC-3'  
BdorOBP19 left 5'-CCGTCCTGAAAATGGCCAAA-3'  
BdorOBP19 right 5'-GCGATAAAGTGCCGCTATGT-3'  
BdorOBP20 left 5'-GCGAGGGTGAGGGCTATAAT-3'  
BdorOBP20 right 5'-CTTGCTTGCCATCACACACT-3'  
BdorOBP21 left 5'-AACACAAACCTGCTCGCATC-3'  
BdorOBP21 right 5'-TGGCATCGCTAGCTTTCATG-3'  
BdorOBP22 left 5'-CTGCTGCTGAATCTGAACCG-3'  
BdorOBP22 right 5'-GCACTTTGACACTCTGAGCC-3'  
BdorOBP23 left 5'-GCGCATAGAAGTGATGAGCA-3'  
BdorOBP23 right 5'-CGCGCTCACAGGAATCTTC-3'  
BdorOBP24 left 5'-TGCATGCGTCATGAAAAGAT-3'  
BdorOBP24 right 5'-AAACACGCCCCACTACAAAG-3'  
BdorOBP25 left 5'-AAGGAGCAGCGAGAATGTGT-3'  
BdorOBP25 right 5'-CATGCCGGTTTTGTCAACTA-3'  
BdorOBP26 left 5'-TTAGCGTGCACAGCTGTTAG-3'  
BdorOBP26 right 5'-TTTTAGTTACCGTGCCTGCC-3'  
BdorOBP27 left 5'-CGCTGCTACATTGAGTGCAT-3'  
BdorOBP27 right 5'-CTGCACCAGCGGTAAATTCT-3'
